# Supplementary material for: DNA methylation insulates genic regions from CTCF loops near nuclear speckles
Source: eLife. 2025 Sep 3;13:RP102930. doi: 10.7554/eLife.102930 (PMC12408068; doi:10.7554/eLife.102930)
Supplement: Supplementary file 1. [file elife-102930-supp1.xlsx]

## Sheet: Sheet1
			Hi-C PRO stats						Hichipper stats
sample	Rep	Total reads(million)	valid_interaction	valid_interaction_rmdup	trans_interaction	cis_interaction	cis_shortRange	cis_longRange	Valid_Intra_<5Kb	Valid_Intra_5Kb-2Mb	Valid_Intra_>2Mb	HQ_Reads_In_Anchors	Valid_Intra_anchor_5Kb-2Mb
K562 DNMT1i 3 day	1	104.6	65967039	55608186	13830349	41777837	8760142	33017695	3457421	29898133	8422884	70146374	974428
K562 DNMT1i 3 day	2	102.7	63791967	56538048	15050926	41487122	8948844	32538278	3623891	29473863	8389992	66788913	938121
K562 DMSO 3 day	1	90.6	57941617	49357454	12375406	36982048	8357401	28624647	3471162	26264648	7246774	46523179	640617
K562 DMSO 3 day	2	97.8	62749160	45701128	10277991	35423137	7288965	28134172	2914991	25948967	6559680	67981183	918398
HCT116 DNMT1i 3 day	1	88.7	45714047	29859739	7924524	21935215	4513114	17422101	1948084	14354876	5632575	65430702	591077
HCT116 DNMT1i 3 day	2	100.5	60221627	45341386	12111081	33230305	6414206	26816099	2667974	21664720	8898026	63401194	737118
HCT116 DMSO 3 day	1	77.6	48147663	29149302	7772604	21376698	3925415	17451283	1589561	14221634	5565726	55908246	598347
HCT116 DMSO 3 day	2	93.1	59780647	44611939	12044531	32567408	6342591	26224817	2590496	21479990	8497368	67786468	836176
K562 SON/SRRM2 dTAG knockin 6 hr DMSO	1	155.1	92108562	38979289	6859156	32120133	7416442	24703691	3071100	24714467	4335084	107536199	831680
K562 SON/SRRM2 dTAG knockin 6 hr DMSO	2	124.6	75150110	31858168	5627810	26230358	5877183	20353175	2360671	20339925	3530170	88313412	684637
K562 SON/SRRM2 dTAG knockin 6 hr dTAG	1	124.7	74817855	38466712	7034121	31432591	6942759	24489832	2735806	24457850	4239373	92096324	812261
K562 SON/SRRM2 dTAG knockin 6 hr dTAG	2	137.6	84881710	47991570	9108611	38882959	8315486	30567473	3208857	30266591	5408105	100135006	970598
K562 SON/SRRM2 dTAG knockin 12 hr dTAG	1	41.4	25259723	23083320	3483737	19599583	5259927	14339656	2498944	14502071	2598935	37206928	688122
K562 SON/SRRM2 dTAG knockin 12 hr dTAG	2	31.3	19278494	17654931	2643733	15011198	3960466	11050732	1849327	11096728	2065402	27551182	501821
K562 SON/SRRM2 dTAG knockin 12 hr DMSO	1	41.1	25157860	22967984	3202396	19765588	5480344	14285244	2646723	14445896	2673320	37228519	706861
K562 SON/SRRM2 dTAG knockin 12 hr DMSO	2	34.4	21275062	19484856	2930099	16554757	4481724	12073033	2159731	12099156	2296171	31990970	600297
